# Supplementary material
Source: Springer Nature journal article supplement (https://www.springermedizin.de/resource/supplementary/12985_2009_623_MOESM10_ESM.pdf/9608128)

**A****The Effect of Cathepsin B Treating Reporter Virions on Furin Inhibition**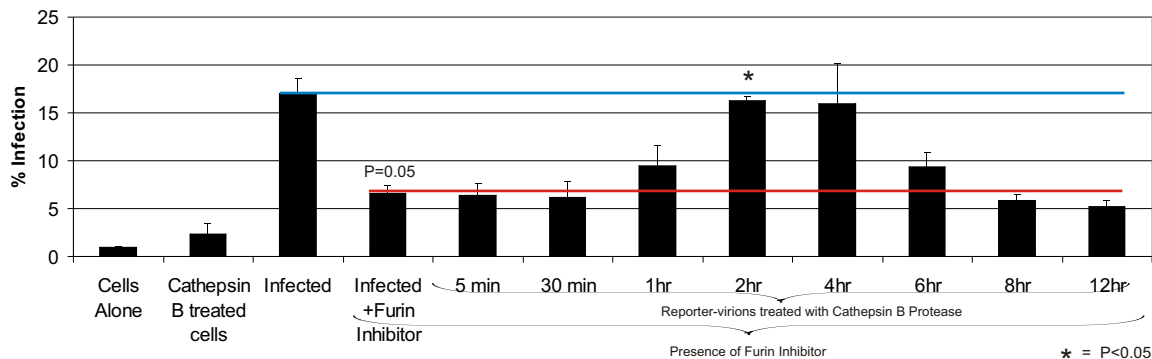**B****The Effect of Cathepsin L Treating Reporter Virions on Furin Inhibition**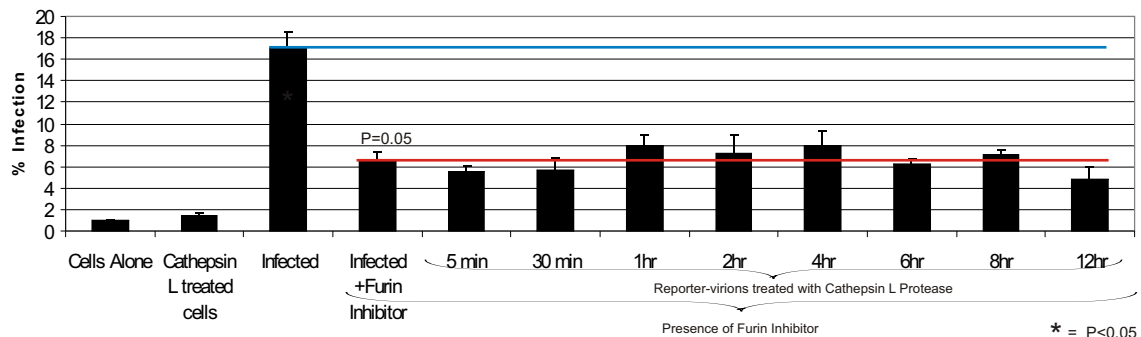

Supplement: MOESM10 [file 9608128]
